# Supplementary material
Source: publisher site journal article supplement (http://degruyter.com/publication/journal_key/CHEM/downloadAsset/CHEM_CFP_Phytochemical%20and%20Pharmacological%20Scrutinization%20of%20Medicinal%20Plants.pdf)
Supplement: Supplementary file 1 [file CHEM_CFP_Phytochemical%20and%20Pharmacological%20Scrutinization%20of%20Medicinal%20Plants.pdf]

## GUEST EDITOR

**Dr. Riaz Ullah**, Department of Pharmacognosy; College of Pharmacy; King Saud University Riyadh Saudi Arabia

**Professor Dr. Sezai Ercisli**, Department of Horticulture, Agricultural Faculty, Ataturk University, Erzurum, Turkey

## DESCRIPTION

Medicinal plants or herbal remedy are practiced for the treatment of different infections globally. These plants provide as a basis of motivation for novel therapeutic constituents. The pharmacological potential of plants is owed to the existence of a wide variety of secondary metabolites such as essential oil, flavonoids, glycosides, alkaloids, tannins, terpenoids etc. Medicinal plants and their extracts represent a rich source of crude medications that possess therapeutic properties. The World Health Organization reports that various plant fractions and their dynamic constituents are utilized as traditional medicines by 80% of the world population. Plants are the primary source for different pharmaceutical, perfumery, flavor, and cosmetics industries. The use of modern drugs dramatically resulted into resistant microorganisms toward different modern drugs. The researchers are now in search for alternate source of treatment of various disorders.

Aim of this special issue to collect latest data on:

1. Natural Product Isolation and identification from Medicinal Plants;
2. Characterization of plant crude extract with modern techniques;
3. Pharmacological uses of isolated compounds and crude extract;
4. Poisonous effect of medicinal plants;
5. Ethnobotanical uses of medicinal plants around the world;
6. Polyherbal remedy.

**Submission deadline: 30.06.2024**

## HOW TO SUBMIT

The authors are kindly invited to register at our [paper processing system](#) and submit their contribution (both original papers or reviews are welcome) using a special track established for this special issue (Section/Category – "Special Issue on **Phytochemical and Pharmacological Scrutinization of Medicinal Plants**")

All manuscripts will undergo the standard peer-review process (single-blind, at least two independent reviewers) and will be treated in the same way as other regular articles (indexing, abstracting, immediate publication, etc.). Instructions for authors are available [here](#).

In case of any questions please contact Open Chemistry Managing Editor:  
Małgorzata Komadowska ([openchemistry@degruyter.com](mailto:openchemistry@degruyter.com)).

[degruyter.com/chem](https://degruyter.com/chem)
